# Supplementary material
Source: PubMed Central journal article supplement (PMC3023500)
Supplement: supp_M110.130096_jbc.M110.130096-1.pdf [file supp_M110.130096_jbc.M110.130096-1.pdf]

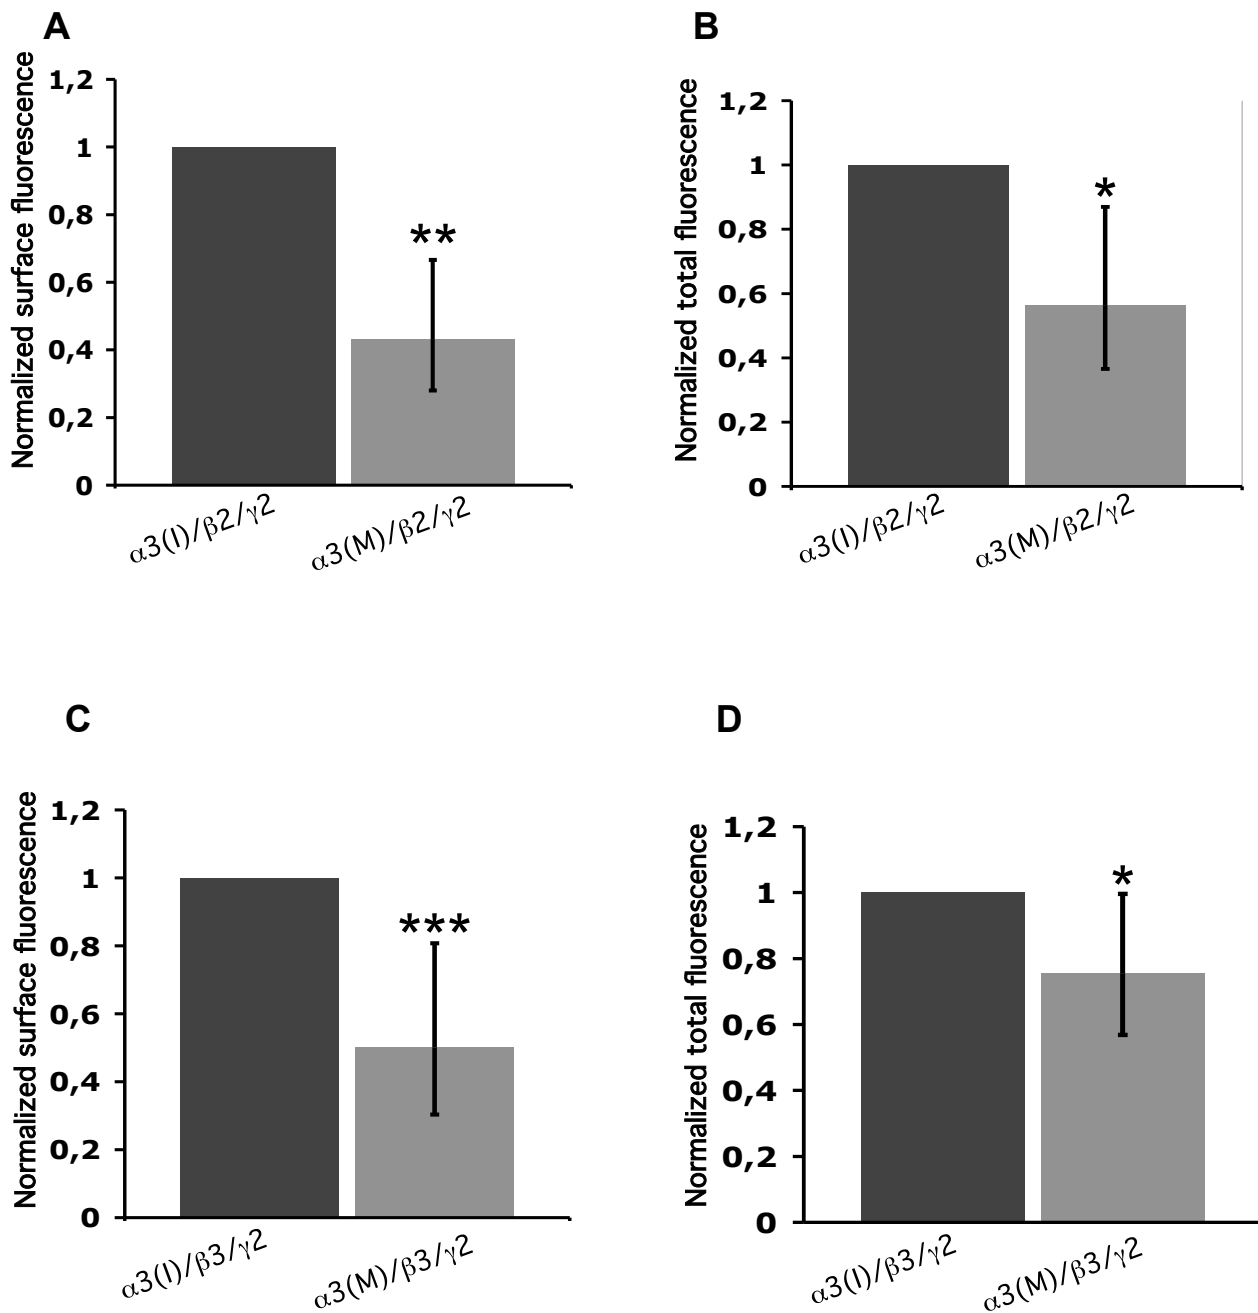

FIGURE S1. The levels of  $\alpha 3$  are independent of the transfection ratio. Confocal microscopy analysis of the  $\alpha 3$  subunit in HEK293 cells using the transfection ratio 1:1:1 between  $\alpha$ ,  $\beta$  and  $\gamma$ . *A*, the cell surface level of  $\alpha 3(M)$  in combination with  $\beta 2$  and  $\gamma 2L$  averaged to 0.43 (95% c.i.=0.28-0.66, when  $\alpha 3(I)$  was normalized to 1 ( $n=3$ )). *B*, the total level of  $\alpha 3(M)$  from transfections as in *A* averaged to 0.56 (95% c.i.=0.36-0.87,  $n=3$ )). *C*, the cell surface level of  $\alpha 3(M)$  normalized to  $\alpha 3(I)$  in combination with  $\beta 3$  and  $\gamma 2L$  was 0.5 (95% c.i.=0.38-0.67,) *D*, total level of  $\alpha 3(M)$  from transfections as in *C* was 0.75 (95% c.i.=0.56-1.0). \*,  $p<0.05$ ; \*\*,  $p<0.01$ ; \*\*\*,  $p<0.001$ .

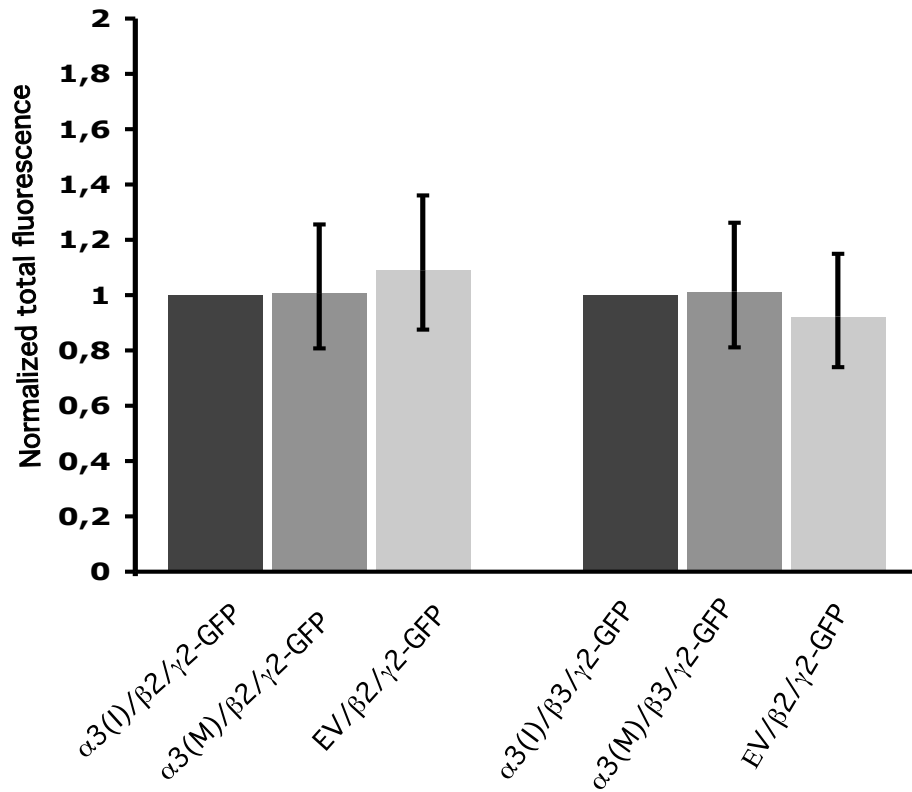

FIGURE S2. The expression of  $\gamma 2L$  is independent of the subunit combination. Confocal microscopy analysis of  $\gamma 2L$ -GFP using different subunit combinations with the transfection ratio 1:1:1. Left, as indicated the rate of  $\gamma 2L$ -GFP expression in combination with  $\alpha 3(I)$ ,  $\alpha 3(M)$  or empty vector (EV) together with  $\beta 2$ . The measurements are normalized to  $\gamma 2L$ -GFP in combination with  $\alpha 3(I)$  and  $\beta 2$  ( $n=3$ ,  $p=0.9$ ) indicating no statistical differences between the transfections. Right, the rate of  $\gamma 2L$ -GFP expression in combination with  $\alpha 3(I)$  or  $\alpha 3(M)$  or EV together with  $\beta 3$  ( $n=3$ ,  $p=0.4$ ). As with  $\beta 2$ , there are no statistical differences in the expression of  $\gamma 2L$ -GFP between the transfections.

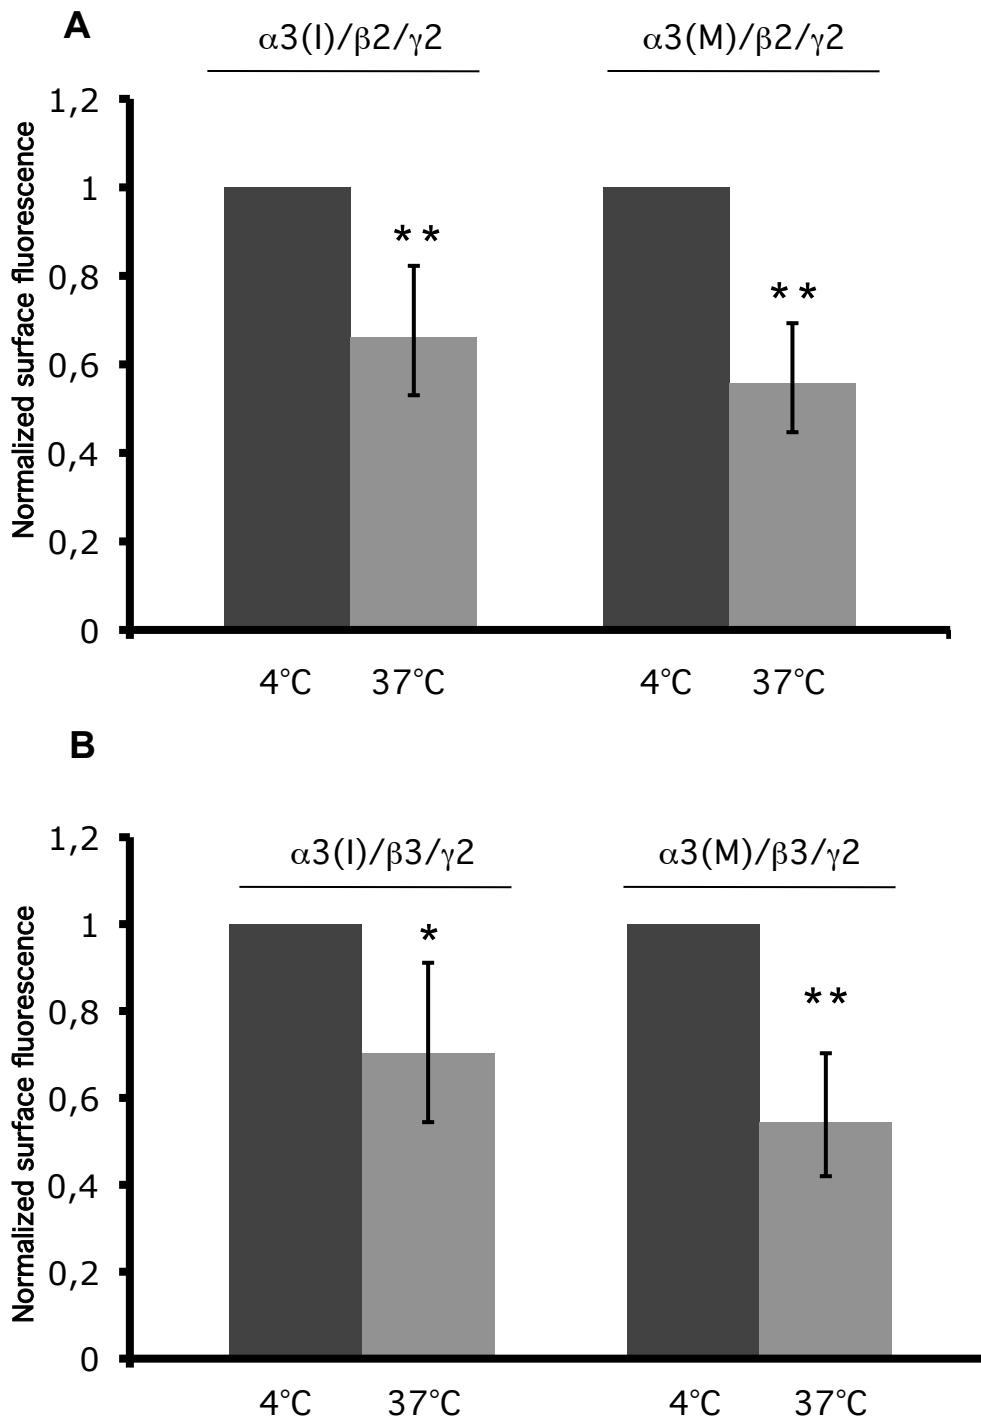

FIGURE S3. Quantification of the effect of internalization in HEK293 cells expressing GABA<sub>A</sub> receptor subunits. The  $\alpha3$  subunits were prebound with the  $\alpha3$ -antibody at 4°C for 30 min. Cells were rinsed and incubated at 37°C for 60 min to allow internalization, while control cells were left at 4°C to prevent internalization. *A* Internalization of the  $\alpha3(I)$  or  $\alpha3(M)$  when assembled with  $\beta2$  and  $\gamma2$ . Cell surface intensity of  $\alpha3(I)$  or  $\alpha3(M)$  in control and internalization experiments as indicated. The rate of internalization was normalized to control cells that were left at 4°C (n=3). Values are represented as mean with 95% c.i.. \* $p$ <0.05, \*\* $p$ <0.01. *B* Internalization of the  $\alpha3(I)$  or  $\alpha3(M)$  when assembled with  $\beta3$  and  $\gamma2$ . Cell surface intensity in control and internalization experiments as indicated (n=3) \*\*  $p$ =0.001.

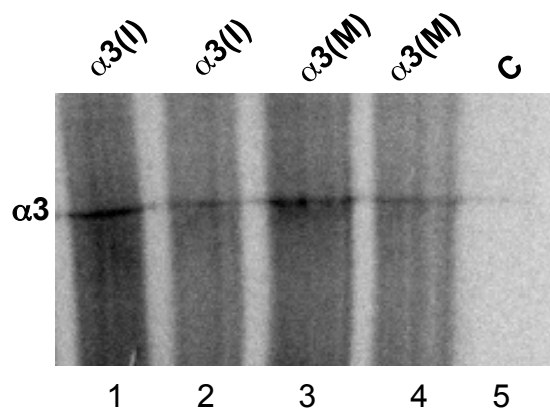

FIGURE S4. In vitro translation of  $\alpha 3(I)$  and  $\alpha 3(M)$ . In vitro transcripts coding for  $\alpha 3(I)$  and  $\alpha 3(M)$  were made and in vitro translated using rabbit retic lysate. Lane 1 and 3, 2  $\mu\text{g}$  of SP6 transcript is used and in lane 2 and 4 translation is from 20 $\mu\text{g}$  of SP6 in vitro transcript. The excess of RNA added to the reaction in lane 2 and 4 has an inhibitory effect on translation. In lane 5 (C) no RNA was added to the lysate.
